1 **Title :**

2 **Sequencing using a two-steps strategy reveals high genetic diversity in the S**  
3 **gene of SARS-CoV-2 after a high transmission period in Tunis, Tunisia.**

4

5 **Authors:**

6 **Wasfi Fares<sup>1\*§</sup>, Kais Ghedira<sup>2\*</sup>, Mariem Gdoura<sup>1,4</sup>, Anissa Chouikha<sup>1</sup>, Sondes Haddad-**  
7 **Boubaker<sup>1</sup>, Marwa Khedhiri<sup>1</sup>, Kaouthar Ayouni<sup>1</sup>, Asma Lamari<sup>1</sup>, Henda Touzi<sup>1</sup>, Walid**  
8 **Hammemi<sup>1</sup>, Zina Medeb<sup>1</sup>, Amel Sadraoui<sup>1</sup>, Nahed Hogga<sup>1</sup>, Nissaf ben Alaya<sup>3,5</sup>, Henda**  
9 **Triki<sup>1,5</sup>**

10 1. Laboratory of Clinical Virology - Reasearch Laboratory "Viruses Vectors and Hosts" (LR20-IPT10) -  
11 Institut Pasteur, University of Tunis-EI Manar, Tunis, Tunisia

12 2. Laboratory of Bioinformatics, Biomathematics and Biostatistics (BIMS), Institut Pasteur de Tunis  
13 (IPT), 13, Place Pasteur BP 74, Tunis 1002, University of Tunis-EI Manar, Tunis, Tunisia.

14 3. National Observatory for New and Emerging Diseases, Ministry of Health, Tunis, Tunisia

15 4. Faculty of Pharmacy, University of Monastir, Tunisia

16 5. Faculty of Medicine, University of Tunis-EI Manar, Tunis, Tunisia

17

18 \* Both authors have equally contributed to this work

19 § Correspondence should be addressed to this author

20 E-mail addresses: [Wasfi.fares@pasteur.tn](mailto:Wasfi.fares@pasteur.tn);

21

22 **Abstract:**

23 Recent efforts have reported numerous variants that influence SARS-CoV-2 viral  
24 characteristics including pathogenicity, transmission rate and ability of detection by  
25 molecular tests. Whole genome sequencing based on NGS technologies is the  
26 method of choice to identify all viral variants; however, the resources needed to use  
27 these techniques for a representative number of specimens remain limited in many  
28 low and middle income countries. To decrease sequencing cost, we developed a  
29 couple of primers allowing to generate partial sequences in the viral S gene allowing  
30 rapid detection of numerous variants of concern (VOCs) and variants of interest  
31 (VOIs); whole genome sequencing is then performed on a selection of viruses based  
32 on partial sequencing results. Two hundred and one nasopharyngeal specimens  
33 collected during the decreasing phase of a high transmission COVID-19 wave in  
34 Tunisia were analyzed. The results reveal high genetic variability within the sequenced  
35 fragment and allowed the detection of first introduction in the country of already known  
36 VOCs and VOIs as well as others variants that have interesting genomic mutations  
37 and need to be kept under surveillance.

38 **Importance:**

39 The method of choice for SARS-CoV-2 variants detection is whole genome  
40 sequencing using NGS technologies. Resources for this technology remain limited in  
41 many low and middle income countries where it is not possible to perform whole  
42 genome sequencing for representative number of SARS-CoV-2 positive cases. In the  
43 present work, we developed a novel strategy based on a first partial sanger screening  
44 in the S gene including key mutations of the already known VOCs and VOIs for rapid  
45 identification of these VOCs and VOIs and helps to better select specimens that need  
46 to be sequenced by NGS technologies. The second step consisting in whole genome  
47 sequencing allowed to have a holistic view of all variants within the selected viral  
48 strains and confirmed the initial classification of the strains based on partial S gene  
49 sequencing.

50

51

52

53 **Key words:** COVID-19, SARS-CoV-2, whole genome sequencing, VOCs, VOIs,  
54 protein Spike, Tunisia

55

56

## 57 **Introduction**

58 Severe acute respiratory syndrome coronavirus 2 (SARS-CoV-2), which is the  
59 causative agent of human coronavirus disease 2019 (COVID-19), was identified in  
60 Wuhan-China in December 2019 (1, 2). The outbreak of the coronavirus disease  
61 (COVID-19) rapidly spread worldwide; it was officially declared as pandemic by the  
62 World Health Organization (WHO) on March 11, 2020 (3) and now represents a  
63 tremendous threat globally.

64 SARS-CoV-2 is a single-stranded positive RNA virus, a member of the Beta  
65 coronavirus genus that also contains SARS-CoV and MERS-CoV. The first sequence  
66 of the virus was published in January 2020 (4). The structural genome region, located  
67 in the 3' part of the genome, encodes four structural proteins: spike (S), envelope (E),  
68 membrane (M) and nucleocapsid (N) (5). The S protein forms a trimer on the surface  
69 of the virion, it mediates virus attachment to the ACE-2 receptor and its entry to the  
70 host cells (6). The S Protein is composed of two sub-units, S1 containing the receptor-  
71 binding domain (RBD) and S2 that mediates membrane fusion (7). The S protein  
72 determines SARS-CoV-2 infectivity and transmissibility and is also the major antigen  
73 inducing protective immune response (8). Since the beginning of the COVID-19  
74 pandemic, the S protein has been undergoing several mutations and it is highly  
75 important to follow the emergence of these variants and their biological,  
76 epidemiological and clinical significance. Early in the pandemic, variants of SARS-  
77 CoV-2 containing a D to G substitution in the 614 amino-acid residue of the S protein  
78 (D614G) were reported. This substitution increased receptor binding avidity and  
79 D614G mutants became dominant in many geographic regions (9-11). In December  
80 2020, the United Kingdom reported a variant of concern (VOC), referred as B.1.1.7,  
81 with enhanced transmissibility within the population (12, 13). This variant became  
82 predominant in the UK and spread to more than 100 countries in the world. In January  
83 2021, two other VOCs, referred as B.1.351 and B.1.1.28, also with high transmissibility,  
84 were reported in South Africa and Brazil, respectively (14-16). Later, many other  
85 variants, classified as Variants Under Investigation (VUIs) were reported throughout  
86 the world. In addition to the increased transmissibility, it is suggested that some  
87 mutations in these variants may affect the performance of some diagnostic real-time  
88 PCR tests and reduce susceptibility to vaccine-induced neutralizing antibodies (9, 10,

89 17-22). Global tracking of these newly identified VOCs and VUIs as well as any other  
90 evolving SARS-CoV-2 variant, by genomic surveillance and rapid sharing of viral  
91 genomic sequences, is highly recommended in order to limit their spread and control  
92 the pandemic.

93 Nowadays, several classifications of SARS-Co V-2 strains in lineages or clades were  
94 proposed. Indeed, two different lineages, A and B, were proposed by the Phylogenetic  
95 Assignment of Named Global Outbreak (PANGO) lineage nomenclature, while a  
96 classification in 11 different clades (19-A, 19-B, 20-A to 20-I) was proposed by the  
97 Nextstrain resources and another classification in 9 clades (S, L, O, V, G, GH, GR,  
98 GRY and GV) was proposed by GISAID.

99 In Tunisia, the first case of SARS-CoV-2 infection was reported on March 03, 2020  
100 (23). The country experienced a first wave of the COVID disease and, through setting  
101 up drastic nation-wide multi-sectoral measures to avoid international introduction of  
102 the virus and its spread within the population, COVID-19 incidence decreased in May-  
103 June 2020 to reach zero cases per day from the 4th to the 11th of June 2020. The  
104 national strategy included early detection of imported cases, quarantining of new  
105 confirmed cases as well as suspected cases and strict travel restrictions. After the  
106 sharp decrease of the disease incidence; a relaxation in the application of these  
107 measures by the general population, combined with decreased restrictions in  
108 international transportation, led to the re-introduction of the virus again and the  
109 establishment of a local transmission. In late July, COVID-19 incidence started to  
110 increase again and the country experienced a second wave with highest incidence in  
111 January 2021, associated with a high local transmission within the population. Starting  
112 from February 2021, the disease incidence together with mortality rates decreased  
113 again.

114 The present work reports the genomic features of SARS-CoV-2 sequences detected  
115 in Tunisia during the late phase of the second wave of the pandemy and reveals the  
116 co-circulation of several variants, some of which are already known as VOCs, others  
117 have interesting genomic mutations and need to be kept under surveillance.

## 118 **Material and Methods**

### 119 **Nasopharyngeal samples.**

120 A total of 201 SARS-CoV-2 positive nasopharyngeal samples, collected from  
121 individuals living in the four districts of Tunis capital, were included in this study.  
122 Sample collection was performed from January to March 2021, during the decreasing  
123 phase of the second wave of COVID-19 outbreak in Tunisia (**Figure1**). The study  
124 population includes symptomatic patients presenting with mild COVID clinical forms or  
125 with severe forms as well as asymptomatic individuals sampled after a contact with  
126 confirmed cases. The study population included 91 males and 110 females, their age  
127 ranged from 5 to 98 years. The samples were collected by the health teams from the  
128 Ministry of Health, at home for asymptomatic individuals and those with non-severe  
129 clinical symptoms, or at the health facility level for hospitalized patients. Samples were  
130 transported, refrigerated and within 24 hours, to the Pasteur Institute of Tunis where  
131 they were immediately processed for SARS-CoV-2 detection by specific real time  
132 reverse transcription polymerase chain reaction (RT-PCR) according to WHO  
133 approved protocols (24, 25).

#### 134 **Ethical statement**

135 This work was performed in the frame of COVID-19 diagnostic effort, and all samples  
136 used for analysis were anonymized. This study was approved by the Bio-Medical  
137 Ethics Committee of the Pasteur Institute of Tunis, Tunisia réf. 2020/14/I/LR16IPT/V1

#### 138 **Primer design.**

139 Primers were designed using PrimerDesign-M online software, available through  
140 [https://www.hiv.lanl.gov/content/sequence/PRIMER\\_DESIGN/primer\\_design.html](https://www.hiv.lanl.gov/content/sequence/PRIMER_DESIGN/primer_design.html)  
141 (26, 27), based on an alignment of 13451 SARS-CoV-2 complete genome sequences.  
142 Several points were considered such as melting temperatures, G+C percentage,  
143 entropy, complexity and nucleotide composition, in order to perfectly align with the  
144 SARS-CoV-2 sequence. The selected primers sequences were as follows: IPT\_FW:  
145 (22964-22987) 5'-ATTTCAACTGAAATCTATCAGGCC-3' and IPT\_REV: (23666-  
146 23647) 5'-CTGCACCAAGTGACATAGTG-3'. Indicated positions correspond to the  
147 sequence of Wuhan reference strain (accession number: NC045512). The designed  
148 primers allow the amplification of a 703-nucleotide-long region in the S gene holding

149 key mutations, that includes the E484K, N501Y, A570D, D614G and P681H, recently  
150 identified as specific of the main VOCs and VUIs of SARS-CoV-2.

### 151 **PCR amplification and sequencing in the S gene.**

152 A volume of 140µl of nasopharyngeal samples was used for viral RNA extraction with  
153 viral RNA Mini Kit (Qiagen, Hilden, Germany) to give a final elution volume of 60µl of  
154 total RNA. The presence of SARS-CoV-2 RNA was determined by conventional  
155 reverse transcription PCR using the SuperScript®III One-Step RT-PCR System with  
156 Platinum® Taq DNA Polymerase kit (Invitrogen) in a 25µl reaction volume containing  
157 12.5µl of 2X buffer, 0.5µl Rnasin (Promega), 1µl of each reverse and forward primers  
158 (10µM), 1µl Enzyme mix and 5µl of total extracted RNA. Optimized cycling conditions  
159 was performed as follows: Reverse transcription with initial incubation at 50°C for  
160 30min and 94°C for 2min followed by 35 cycles, repeating denaturation at 94°C for  
161 15sec, annealing at 54°C for 45sec and elongation at 72°C for 30sec, and final  
162 elongation at 72°C for 10min. Amplification products are first visualized by  
163 electrophoresis in agarose gels and then purified by the ExoSAP-IT method using the  
164 Exonuclease-I and the Shrimp Alkaline Phosphatase (Invitrogen). The purified  
165 amplicons were sequenced using the Big Dye Terminators v3.1 kit (Applied  
166 Biosystems) and the forward and reverse PCR primers. The resulting consensus  
167 sequences were deduced by aligning the forward and the reverse sequence of each  
168 isolate, excluding primer binding regions and are 618 nucleotides-long (positions  
169 22988 to 23605 according to the Wuhan reference strain NC045512). They were  
170 submitted to the NCBI database under accession number MZ150010 - MZ150210.

### 171 **Whole genome sequencing.**

172 The QIAseq SARS-CoV-2 Primer Panel paired with the QIAseq FX DNA Library  
173 construction kits (Qiagen GmbH, Germany) were used for enriching and sequencing  
174 the entire SARS-CoV-2 viral genome. Extracted RNA from nasopharyngeal swabs  
175 was first depleted of ribosomal RNA using RiboZero rRNA removal Kit (Illumina, USA).  
176 The residual RNA was then converted to double stranded cDNA using random  
177 priming. Following cDNA synthesis, QIAseq SARS-CoV-2 Primer Panel kit was used  
178 including high fidelity multiplex PCR reaction yielding 400bp amplicons covering the  
179 full viral genome. The multiplexed amplicon pools were then converted to sequencing

180 libraries by enzymatic fragmentation with 250bp fragment size, end repair and ligation  
181 to adapters with the QIAseq FX DNA Library construction kits. Thereafter, the  
182 constructed DNA library was purified and adapter-dimers were removed with  
183 Agencourt AMPure XP beads. The libraries were sequenced using Nextseq (Illumina  
184 Inc, USA) to generate 2x150 bp paired-end sequencing reads.

185 Sequences' raw data have been processed using fastqc version 0.11.9 for quality  
186 control (<https://www.bioinformatics.babraham.ac.uk/projects/fastqc/>). Low  
187 quality reads and adapters have been filtered using trimmomatic version 0.39 (28) with  
188 a Phred quality score of 30 as threshold. Genome consensus sequences were  
189 assembled by mapping on the SARS-CoV-2 reference genome of GenBank accession  
190 number NC045512 (Wuhan-Hu-1 isolate) using Spades assembler version 3.15.0  
191 (29), with thresholds of 80% for nucleotide sequence coverage and 90% for nucleotide  
192 similarity. The obtained SARS-CoV-2 new sequences were submitted to the GISAID  
193 database (<https://www.gisaid.org>) (30, 31) with the following accession numbers:  
194 EPI\_ISL\_2035560, EPI\_ISL\_2035563, EPI\_ISL\_2035720, EPI\_ISL\_2035734,  
195 EPI\_ISL\_2035752, EPI\_ISL\_2035753, EPI\_ISL\_2035940 to EPI\_ISL\_2035949,  
196 EPI\_ISL\_2035988 and EPI\_ISL\_2036077.

### 197 **Phylogenetic analysis.**

198 The obtained partial S gene sequences and selective whole genome sequences were  
199 aligned together with representative SARS-CoV-2 reference sequences of the nine  
200 recognized GISAID clades publically available in the GISAID database using MUSCLE  
201 multiple sequence alignment algorithms (32) implemented in MEGAX (33).  
202 Phylogenetic analyses were performed on nucleotide sequences using the maximum  
203 likelihood method with the Tamura 3-parameter model then on amino acid sequences,  
204 obtained from the aligned sequences, using the maximum likelihood method and the  
205 Jones Taylor Thornton model. The tree topologies were supported by 1000 bootstrap  
206 replicates.

207 Mutation profiles in the ORF1a, ORF1b, S, ORF3a, E, M, ORF6, ORF7a, ORF8, N,  
208 and ORF10 genomic regions of SARS-CoV-2 were assessed, by comparing the  
209 nucleotide and deduced amino acid sequences of the Tunisian strains with those of



210 the Wuhan reference strain, using the sequence alignment performed by MUSCLE  
211 multiple sequence alignment algorithms (32) implemented in MEGAX (33).

## 212 **Results**

213 Phylogenetic tree in **Figure2** was performed based on the alignment of the 618-  
214 nucleotides fragment in the S gene of the 201 studied Tunisian SARS-CoV-2 strains,  
215 together with the 9 selected references SARS-CoV-2 sequences according to the  
216 GISAD nomenclature. The tree topology shows that the Tunisian sequences are  
217 divided into 3 different clusters. Cluster1, represented in purple color, includes the  
218 highest number of sequences (174 out of 201, 86.5% of Tunisian strains) that clustered  
219 with the 4 reference sequences of the GISAID Clades G, GH, GR and GV. The  
220 phylogenetic distribution within this cluster shows several phylogenetic sub-branches  
221 reflecting a large genetic variability. Cluster2 indicated in blue color comprises 15  
222 identical sequences that clustered with the GISAID reference sequence from Clade  
223 GRY. Cluster3, indicated in red color, contains 12 sequences that clustered with the  
224 GISAID reference sequence from Clade S.

225 Eighteen representative samples from these clusters, indicated by a green square in  
226 Figure2, were selected for whole genome sequencing: 13 from Cluster1, 2 from  
227 Cluster2 and 3 from Cluster3. The phylogenetic tree of the obtained 18 whole genome  
228 sequences, together with the 9 GISAID references SARS-CoV-2 sequences, is shown  
229 in **Figure3**. The figure also shows the classification of the Tunisian sequences  
230 according to the PANGO and the Nextstrain classifications. The phylogenetic  
231 distribution of the sequences based on whole genome sequences (Figure3) is similar  
232 to the one obtained in Figure2, based on the partial S gene genomic data.

233 The 13 sequences from Cluster1 highlighted in purple color in Figure2 grouped  
234 together within PANGO B lineage in Figure3. The phylogenetic distribution of these  
235 sequences clearly shows the presence of 3 sub-clusters called sub-cluster 1a, 1b and  
236 1c classified as clade G/20A, GV/20A-C and GH/20C respectively according to the  
237 GISAID/Nextstrain nomenclatures. Sub-cluster 1a is represented by only one  
238 sequence (SP-0362), while Sub-cluster 1b and Sub-cluster 1c are represented by 4  
239 (SP-0202, SP-0083, SP-0377 and SP-0036) and 8 (SP-0378, SP-0017, SP-0382, SP-  
240 0210, SP-0084, SP-0089, SP-0055 and SP-0105) sequences respectively.

241 Two sequences from Cluster2 in Figure 2 were also found to cluster together with the  
242 reference sequence of the GR GISAID Clade based on whole genome sequencing  
243 comparison; the sequences also belong to the PANGO B lineage and to the 20B Clade  
244 of the Nextstrain nomenclature.

245 Unlike the sequences from Cluster1 and Cluster2, the three whole genome sequences  
246 from Cluster3 belong to the PANGO A lineage. They grouped together with the  
247 reference sequence of the S GISAID Clade, similarly to the results obtained based on  
248 the partial S sequences.

249 The amino acid sequences related to the 201 partial S sequences and the 18 whole  
250 genome sequences were deduced from the obtained nucleotide sequences and  
251 compared to the Wuhan reference protein sequences.

252 Table 1 shows the amino acid substitution profile in the sequenced fragment of the S  
253 gene of the 201 samples investigated in the present study. Fourteen different mutation  
254 profiles were found. Most of the sequences (147/174) had zero non synonymous  
255 mutation as compared to the Wuhan reference, excepting the D614G which was found  
256 in all the sequences from cluster 1 and Cluster 2. The remaining 27 sequences from  
257 Cluster1 had 1 to 2 additional substitutions within the sequenced fragment (**Table 1**).  
258 The 15 sequences from Cluster 2 shared an identical mutational profile with the amino  
259 acid substitutions N501Y, A570D, D614G and P681H which are known to be  
260 characteristic of the VOC B.1.1.7 initially detected in the UK. The 12 sequences from  
261 Cluster did not have the D614G substitution but three mutations that suggest the VUI  
262 A.27 (N501Y, A653V, Q655H); one sequence (SP-0347 which was in a separate  
263 branch within the phylogenetic tree shown in Figure2), had an additional substitution  
264 (Q677H).

265 Table2 shows the amino acid substitution profile along the whole genome of the 18  
266 selected Tunisian SARS-CoV-2 and representative from the different clusters found  
267 based on S partial sequences. The two sequences from Cluster 2 had identical  
268 mutational profile in the S gene and a total of 23 and 24 amino acid substitution along  
269 the whole genome; these results confirm the belonging of the two sequences to the  
270 B1.1.7 lineage (VOC). The three sequences from Cluster 3 shared 15 identical amino  
271 acid substitutions along the whole genome and the results confirm the belonging of

272 the three sequences to the A.27 lineage, identified as variant of interest (VOI) initially  
273 detected in France. Among Cluster 1, one sequence (SP062 – Sub-Cluster 1a) had a  
274 mutational profile that corresponds to the identified variant of interest (VOI) B.1.525  
275 initially detected in Nigeria and in the UK. The sequences from Sub-Cluster 1c shared  
276 several identical mutations in the non structural regions of the genome and belonged  
277 to the B.1.160 lineage that is not presently identified as VOC or VOI. The same is for  
278 the sequences from Sub-Cluster 1b that had more genetic diversity and belonged to  
279 the B.1.177 lineage.

## 280 **Discussion**

281 Since the beginning of the COVID-19 pandemic, several SARS-CoV-2 variants  
282 emerged, some of them totally changed the infection epidemiology. First, a variant  
283 with the D614G mutation emerged and became dominant globally (34). In our series,  
284 this mutation is found in 186 out of the 201 isolates (92%). Other variants emerged  
285 subsequently and it is now hypercritical to track the already known of them labelled as  
286 VOCs or VOIs and also to monitor the emergence of new variants. The method of  
287 choice is whole genome sequencing using NGS high throughput technologies which  
288 improved considerably during the last years with a cost that declines continuously.  
289 However, despite this progress, NGS is still expensive and resources for this  
290 technology remain limited in many low and middle income countries where it is not  
291 possible to perform whole genome sequencing for representative number of SARS-  
292 CoV-2 positive cases. Thus, the use of other technologies to identify isolates that are  
293 to be sequenced in priority is highly needed. Several real-time PCR tests that target  
294 the already known VOCs, especially the B.1.1.7 (United Kingdom), B.1.351 (South  
295 Africa) and B1.1.28 (Brazil) are now commercially available. They can be very useful  
296 to rapidly identify the introduction of these VOCs to a country/region and to monitor  
297 their transmission. However, these kits cannot detect other variants of interest that  
298 already emerged, or that may emerge any time. Furthermore, other variants can be  
299 characterized by the failure to detect the S gene in these tests, known as S gene target  
300 failure (SGTF) (35).

301 In the present work, we developed a couple of primers allowing to generate a 618-  
302 nucleotide-long sequence in the viral S gene that includes key mutations of the already  
303 known VOCs and VOIs. Sequencing of this fragment by the traditional Sanger

304 technology allows rapid identification of these VOCs and VOIs and helps to better  
305 select specimens that need to be sequenced by NGS technologies. Using this  
306 approach, it is possible to detect 14 amino acid substitutions that have been identified  
307 in several VOCs and VOIs (G482V, E484K, N501Y, A570D, D574Y, D614G, E619Q,  
308 A626S, D627E, A653V, H655Y, Q675H, Q677H and P681H) and to get a rapid  
309 orientation towards an already known or a new variant. In our series and using these  
310 primers, we were able to detect the first introduction of the B.1.1.7 (VOC) and two  
311 other VOIs (A.27 and B.1.525) and to select other viruses for WGS based on the  
312 results obtained in the S partial genomic region. The second step consisting in whole  
313 genome sequencing allowed to have a holistic view of all variants within the selected  
314 viral strains and confirmed the initial classification of the strains based on partial S  
315 gene sequencing.

316 The specimens included in the present work were collected in the decreasing phase  
317 of a COVID-19 wave that occurred in Tunisia starting from September 2020 up to  
318 January 2021. This period was characterized by a high transmission within the  
319 population and this explains the high genetic diversity that we found in the obtained  
320 sequences. Several lineages were identified and more than 100 different amino acid  
321 changes, in comparison to the standard Wuhan strain, were identified all through the  
322 viral genome.

323 During the study period, the first isolates of the VOC B.1.1.7, initially identified in the  
324 UK, were detected. The sequenced isolates had the H69del, V70del, Y144del, N501Y,  
325 A570D, D614G P681H, T716I, S982A, D1118H common amino acid substitutions with  
326 the 20I/501Y.V1 (UK variant). Thus, it is highly expected that the genetic features  
327 described herein will rapidly change to a lower genetic variability and a predominance  
328 of the B.1.1.7 UK lineage. Indeed, this is what happened in most countries of the world  
329 where the B.1.1.7 UK lineage was introduced causing devastating waves of COVID-  
330 19 (36, 37). With its higher transmissibility within the human population, it becomes  
331 rapidly predominant once introduced and this is also what is expected to happen in  
332 Tunisia.

333 Furthermore, we were able to detect viruses belonging to the A.27 lineage, initially  
334 detected in Denmark and now classified as VOI. This lineage was detected in around  
335 26 different countries in the world, from Europe, Africa as well as USA and Australia.

336 Whole genome sequencing of three isolates in this series revealed the presence of  
337 amino acid substitutions characteristic of this lineage, including L18F, L452R, N501Y,  
338 A653V, H655Y, D796Y and G1219V and the absence of the D614G substitution in the  
339 Spike protein. One strain (SP-0347) presented two additional substitutions: P26S that  
340 is found in the P1 20J/501Y.V3 (Brazilian variant) and Q677H found in the *Henri*  
341 *Mondor variant* detected in different regions of France (38).

342 We have also detected one sequence (SP062 – Sub-Cluster 1a) with a mutational  
343 profile corresponding to the B.1.525, initially detected in Nigeria and in the UK. This  
344 variant was detected in 48 different countries in the world at writing time and is  
345 presently classified as VOI.

346 The rest of sequences from Sub-Clusters 1b and 1c belonged to the B.1.160 and  
347 B.1.177 lineages that are not presently identified as VOCs or VOIs. These sequences  
348 exhibit quite high genetic variability which is expected after the high active  
349 transmission period that the country experienced in late 2020 and January 2021.  
350 Among all these variants, some may then disappear and other may persist or even  
351 dominate if they have a selective advantage in terms of virulence or transmissibility.

## 352 **Conclusion**

353 In conclusion, this study gives an overview of the SARS-CoV-2 strains circulating in  
354 Tunisia after a high transmission wave of COVID-19. Partial S gene sequencing  
355 followed by whole genome sequencing of a selection of specimen was used to identify  
356 the different circulating variants. This strategy may be of interest for several countries;  
357 it helps to establish a genomic surveillance that is now highly needed in all regions of  
358 the world, with a good cost/effectiveness ratio.

## 359 **ACKNOWLEDGMENTS**

360 This work was co-funded by the Tunisian Ministry of High education and Research  
361 and the European Union's Horizon 2020 research and innovation program under grant  
362 agreement No 883441, project STAMINA (Demonstration of intelligent decision  
363 support for pandemic crisis prediction and management within and across European  
364 borders). The authors thank the field staff from the Ministry of Health for their efforts  
365 in specimen collection and transportation to the laboratory.



## 367 References

- 368 1. Lu H, Stratton CW, Tang Y-W. Outbreak of pneumonia of unknown etiology in  
369 Wuhan, China: The mystery and the miracle. *J Med Virol.* 2020/02/12 éd. avr  
370 2020;92(4):401-2.
- 371 2. Zhu N, Zhang D, Wang W, Li X, Yang B, Song J, Zhao X, Huang B, Shi W, Lu  
372 R, Niu P, Zhan F, Ma X, Wang D, Xu W, Wu G, Gao GF, Tan W; China Novel  
373 Coronavirus Investigating and Research Team. A Novel Coronavirus from  
374 Patients with Pneumonia in China, 2019. *N Engl J Med.* 2020 Feb  
375 20;382(8):727-733. doi: 10.1056/NEJMoa2001017. Epub 2020 Jan 24. PMID:  
376 31978945; PMCID: PMC7092803.
- 377 3. Stefanelli P, Faggioni G, Lo Presti A, Fiore S, Marchi A, Benedetti E, Fabiani  
378 C, Anselmo A, Ciammaruconi A, Fortunato A, De Santis R, Fillo S, Capobianchi  
379 MR, Gismondo MR, Ciervo A, Rezza G, Castrucci MR, Lista F, On Behalf Of  
380 Iss Covid-Study Group. Whole genome and phylogenetic analysis of two  
381 SARS-CoV-2 strains isolated in Italy in January and February 2020: additional  
382 clues on multiple introductions and further circulation in Europe. *Euro Surveill.*  
383 2020 Apr;25(13):2000305. doi: 10.2807/1560-7917.ES.2020.25.13.2000305.  
384 PMID: 32265007; PMCID: PMC7140597.
- 385 4. Lurie N, Saville M, Hatchett R, Halton J. Developing Covid-19 Vaccines at  
386 Pandemic Speed. *N Engl J Med* [Internet]. 30 mars 2020 [cité 23 mars 2021];  
387 Disponible sur: <https://www.nejm.org/doi/10.1056/NEJMp2005630>
- 388 5. Chan JF, Kok KH, Zhu Z, Chu H, To KK, Yuan S, Yuen KY. Genomic  
389 characterization of the 2019 novel human-pathogenic coronavirus isolated from  
390 a patient with atypical pneumonia after visiting Wuhan. *Emerg Microbes Infect.*  
391 2020 Jan 28;9(1):221-236. doi: 10.1080/22221751.2020.1719902. Erratum in:  
392 *Emerg Microbes Infect.* 2020 Dec;9(1):540. PMID: 31987001; PMCID:  
393 PMC7067204.
- 394 6. Yuan M, Wu NC, Zhu X, Lee CD, So RTY, Lv H, Mok CKP, Wilson IA. A highly  
395 conserved cryptic epitope in the receptor binding domains of SARS-CoV-2 and  
396 SARS-CoV. *Science.* 2020 May 8;368(6491):630-633. doi:  
397 10.1126/science.abb7269. Epub 2020 Apr 3. PMID: 32245784; PMCID:  
398 PMC7164391.

- 399 7. Wrapp D, Wang N, Corbett KS, Goldsmith JA, Hsieh CL, Abiona O, Graham  
400 BS, McLellan JS. Cryo-EM structure of the 2019-nCoV spike in the prefusion  
401 conformation. *Science*. 2020 Mar 13;367(6483):1260-1263. doi:  
402 10.1126/science.abb2507. Epub 2020 Feb 19. PMID: 32075877; PMCID:  
403 PMC7164637.
- 404 8. Walls AC, Park Y-J, Tortorici MA, Wall A, McGuire AT, Veerler D. Structure,  
405 Function, and Antigenicity of the SARS-CoV-2 Spike Glycoprotein. *Cell*. 16 avr  
406 2020;181(2):281-292.e6.
- 407 9. Korber B, Fischer WM, Gnanakaran S, Yoon H, Theiler J, Abfalterer W,  
408 Hengartner N, Giorgi EE, Bhattacharya T, Foley B, Hastie KM, Parker MD,  
409 Partridge DG, Evans CM, Freeman TM, de Silva TI; Sheffield COVID-19  
410 Genomics Group, McDanal C, Perez LG, Tang H, Moon-Walker A, Whelan SP,  
411 LaBranche CC, Sapphire EO, Montefiori DC. Tracking Changes in SARS-CoV-  
412 2 Spike: Evidence that D614G Increases Infectivity of the COVID-19 Virus. *Cell*.  
413 2020 Aug 20;182(4):812-827.e19. doi: 10.1016/j.cell.2020.06.043. Epub 2020  
414 Jul 3. PMID: 32697968; PMCID: PMC7332439.
- 415 10. Volz E, Hill V, McCrone JT, Price A, Jorgensen D, O'Toole Á, Southgate J,  
416 Johnson R, Jackson B, Nascimento FF, Rey SM, Nicholls SM, Colquhoun RM,  
417 da Silva Filipe A, Shepherd J, Pascall DJ, Shah R, Jesudason N, Li K, Jarrett  
418 R, Pacchiarini N, Bull M, Geidelberg L, Siveroni I; COG-UK Consortium,  
419 Goodfellow I, Loman NJ, Pybus OG, Robertson DL, Thomson EC, Rambaut A,  
420 Connor TR. Evaluating the Effects of SARS-CoV-2 Spike Mutation D614G on  
421 Transmissibility and Pathogenicity. *Cell*. 2021 Jan 7;184(1):64-75.e11. doi:  
422 10.1016/j.cell.2020.11.020. Epub 2020 Nov 19. PMID: 33275900; PMCID:  
423 PMC7674007.
- 424 11. Zhang L, Jackson CB, Mou H, Ojha A, Rangarajan ES, Izzard T, Farzan M, Choe  
425 H. The D614G mutation in the SARS-CoV-2 spike protein reduces S1 shedding  
426 and increases infectivity. *bioRxiv [Preprint]*. 2020 Jun 12:2020.06.12.148726.  
427 doi: 10.1101/2020.06.12.148726. Update in: *Nat Commun*. 2020 Nov  
428 26;11(1):6013. PMID: 32587973; PMCID: PMC7310631.
- 429 12. Galloway SE, Paul P, MacCannell DR, Johansson MA, Brooks JT, MacNeil A,  
430 Slayton RB, Tong S, Silk BJ, Armstrong GL, Biggerstaff M, Dugan VG.  
431 Emergence of SARS-CoV-2 B.1.1.7 Lineage - United States, December 29,



- 432 2020-January 12, 2021. *MMWR Morb Mortal Wkly Rep.* 2021 Jan 22;70(3):95-  
433 99. doi: 10.15585/mmwr.mm7003e2. PMID: 33476315; PMCID: PMC7821772.
- 434 13. Leung K, Shum MH, Leung GM, Lam TT, Wu JT. Early transmissibility  
435 assessment of the N501Y mutant strains of SARS-CoV-2 in the United  
436 Kingdom, October to November 2020. *Euro Surveill.* 2021 Jan;26(1):2002106.  
437 doi: 10.2807/1560-7917.ES.2020.26.1.2002106. Erratum in: *Euro Surveill.*  
438 2021 Jan;26(3): PMID: 33413740; PMCID: PMC7791602.
- 439 14. Makoni M. South Africa responds to new SARS-CoV-2 variant. *Lancet.* 2021  
440 Jan 23;397(10271):267. doi: 10.1016/S0140-6736(21)00144-6. PMID:  
441 33485437; PMCID: PMC7825846.
- 442 15. Tegally H, Wilkinson E, Giovanetti M, Iranzadeh A, Fonseca V, Giandhari J,  
443 Doolabh D, Pillay S, San EJ, Msomi N, Mlisana K, von Gottberg A, Walaza S,  
444 Allam M, Ismail A, Mohale T, Glass AJ, Engelbrecht S, Van Zyl G, Preiser W,  
445 Petruccione F, Sigal A, Hardie D, Marais G, Hsiao NY, Korsman S, Davies MA,  
446 Tyers L, Mudau I, York D, Maslo C, Goedhals D, Abrahams S, Laguda-Akingba  
447 O, Alisoltani-Dehkordi A, Godzik A, Wibmer CK, Sewell BT, Lourenço J,  
448 Alcantara LCJ, Kosakovsky Pond SL, Weaver S, Martin D, Lessells RJ, Bhiman  
449 JN, Williamson C, de Oliveira T. Detection of a SARS-CoV-2 variant of concern  
450 in South Africa. *Nature.* 2021 Apr;592(7854):438-443. doi: 10.1038/s41586-  
451 021-03402-9. Epub 2021 Mar 9. PMID: 33690265.
- 452 16. Voloch CM, da Silva Francisco R Jr, de Almeida LGP, Cardoso CC, Brustolini  
453 OJ, Gerber AL, Guimarães APC, Mariani D, da Costa RM, Ferreira OC Jr;  
454 Covid19-UFRJ Workgroup, LNCC Workgroup, Adriana Cony Cavalcanti,  
455 Frauches TS, de Mello CMB, Leitão IC, Galliez RM, Faffe DS, Castiñeiras  
456 TMPP, Tanuri A, de Vasconcelos ATR. Genomic characterization of a novel  
457 SARS-CoV-2 lineage from Rio de Janeiro, Brazil. *J Virol.* 2021 Mar  
458 1:JVI.00119-21. doi: 10.1128/JVI.00119-21. Epub ahead of print. PMID:  
459 33649194.
- 460 17. Volz E, Mishra S, Chand M, Barrett JC, Johnson R, Geidelberg L, et al.  
461 Transmission of SARS-CoV-2 Lineage B.1.1.7 in England: Insights from linking  
462 epidemiological and genetic data. *medRxiv.* 1 janv 2021;2020.12.30.20249034.
- 463 18. Kemp S, Harvey W, Lytras S, Carabelli A, Robertson D, Gupta R. Recurrent  
464 emergence and transmission of a SARS-CoV-2 Spike deletion H69/V70.  
465 *bioRxiv.* 1 janv 2021;2020.12.14.422555.

- 466 19. McCarthy KR, Rennick LJ, Nambulli S, Robinson-McCarthy LR, Bain WG,  
467 Haidar G, et al. Natural deletions in the SARS-CoV-2 spike glycoprotein drive  
468 antibody escape. *bioRxiv*. 19 nov 2020;2020.11.19.389916.
- 469 20. Washington NL, White S, Barrett KMS, Cirulli ET, Bolze A, Lu JT. S gene  
470 dropout patterns in SARS-CoV-2 tests suggest spread of the H69del/V70del  
471 mutation in the US. *medRxiv*. 30 déc 2020;2020.12.24.20248814.
- 472 21. Weisblum Y, Schmidt F, Zhang F, DaSilva J, Poston D, Lorenzi JC, Muecksch  
473 F, Rutkowska M, Hoffmann HH, Michailidis E, Gaebler C, Agudelo M, Cho A,  
474 Wang Z, Gazumyan A, Cipolla M, Luchsinger L, Hillyer CD, Caskey M, Robbiani  
475 DF, Rice CM, Nussenzweig MC, Hatziioannou T, Bieniasz PD. Escape from  
476 neutralizing antibodies by SARS-CoV-2 spike protein variants. *Elife*. 2020 Oct  
477 28;9:e61312. doi: 10.7554/eLife.61312. PMID: 33112236; PMCID:  
478 PMC7723407.
- 479 22. Greaney AJ, Loes AN, Crawford KHD, Starr TN, Malone KD, Chu HY, Bloom  
480 JD. Comprehensive mapping of mutations in the SARS-CoV-2 receptor-binding  
481 domain that affect recognition by polyclonal human plasma antibodies. *Cell*  
482 *Host Microbe*. 2021 Mar 10;29(3):463-476.e6. doi:  
483 10.1016/j.chom.2021.02.003. Epub 2021 Feb 8. PMID: 33592168; PMCID:  
484 PMC7869748.
- 485 23. Saidi O, Malouche D, Saksena P, Arfaoui L, Talmoudi K, Hchaichi A, Bouguerra  
486 H, Romdhane HB, Hsairi M, Ouhichi R, Souteyrand Y, Alaya NB; NONED  
487 Working Group. Impact of contact tracing, respect of isolation and lockdown in  
488 reducing the number of cases infected with COVID-19: Case study: Tunisia's  
489 response from March 22 to 04 May 2020. *Int J Infect Dis*. 2021 Feb 9:S1201-  
490 9712(21)00096-5. doi: 10.1016/j.ijid.2021.02.010. Epub ahead of print. PMID:  
491 33578008; PMCID: PMC7872851.
- 492 24. Corman VM, Landt O, Kaiser M, Molenkamp R, Meijer A, Chu DK, Bleicker T,  
493 Brünink S, Schneider J, Schmidt ML, Mulders DG, Haagmans BL, van der Veer  
494 B, van den Brink S, Wijsman L, Goderski G, Romette JL, Ellis J, Zambon M,  
495 Peiris M, Goossens H, Reusken C, Koopmans MP, Drosten C. 2020. Detection  
496 of 2019 novel coronavirus (2019-nCoV) by real-time RT-PCR. *Euro Surveill*  
497 ;25(3). doi: 10.2807/1560-7917.ES.2020.25.3.2000045.
- 498 25. Chu DKW, Pan Y, Cheng SMS, Hui KPY, Krishnan P, Liu Y, Ng DYM, Wan  
499 CKC, Yang P, Wang Q, Peiris M, Poon LLM. Molecular Diagnosis of a Novel

- 500            Coronavirus (2019-nCoV) Causing an Outbreak of Pneumonia. *Clin Chem.*  
501            2020 Apr 1;66(4):549-555. doi: 10.1093/clinchem/hvaa029. PMID: 32031583;  
502            PMCID: PMC7108203.
- 503            26. Yoon H, Leitner T. PrimerDesign-M: a multiple-alignment based multiple-primer  
504            design tool for walking across variable genomes. *Bioinformatics.* 1 mai  
505            2015;31(9):1472.4.
- 506            27. Brodin J, Krishnamoorthy M, Athreya G, Fischer W, Hrabec P, Gleasner C,  
507            Green L, Korber B, Leitner T. A multiple-alignment based primer design  
508            algorithm for genetically highly variable DNA targets. *BMC Bioinformatics.* 2013  
509            Aug 21;14:255. doi: 10.1186/1471-2105-14-255. PMID: 23965160; PMCID:  
510            PMC3765731.
- 511            28. Bolger AM, Lohse M, Usadel B. Trimmomatic: a flexible trimmer for Illumina  
512            sequence data. *Bioinformatics.* 2014 Aug 1;30(15):2114-20. doi:  
513            10.1093/bioinformatics/btu170. Epub 2014 Apr 1. PMID: 24695404; PMCID:  
514            PMC4103590.
- 515            29. Bankevich A, Nurk S, Antipov D, Gurevich AA, Dvorkin M, Kulikov AS, Lesin  
516            VM, Nikolenko SI, Pham S, Pribelski AD, Pyshkin AV, Sirotkin AV, Vyahhi N,  
517            Tesler G, Alekseyev MA, Pevzner PA. SPAdes: a new genome assembly  
518            algorithm and its applications to single-cell sequencing. *J Comput Biol.* 2012  
519            May;19(5):455-77. doi: 10.1089/cmb.2012.0021. Epub 2012 Apr 16. PMID:  
520            22506599; PMCID: PMC3342519.
- 521            30. Elbe S, Buckland-Merrett G. Data, disease and diplomacy: GISAID's innovative  
522            contribution to global health. *Glob Chall.* 2017 Jan 10;1(1):33-46. doi:  
523            10.1002/gch2.1018. PMID: 31565258; PMCID: PMC6607375.
- 524            31. Shu Y, McCauley J. GISAID: Global initiative on sharing all influenza data - from  
525            vision to reality. *Euro Surveill.* 2017 Mar 30;22(13):30494. doi: 10.2807/1560-  
526            7917.ES.2017.22.13.30494. PMID: 28382917; PMCID: PMC5388101.
- 527            32. Edgar RC. MUSCLE: multiple sequence alignment with high accuracy and high  
528            throughput. *Nucleic Acids Res.* 2004 Mar 19;32(5):1792-7. doi:  
529            10.1093/nar/gkh340. PMID: 15034147; PMCID: PMC390337.
- 530            33. Kumar S, Stecher G, Li M, Knyaz C, and Tamura K (2018) MEGA X: Molecular  
531            Evolutionary Genetics Analysis across computing platforms. *Molecular Biology*  
532            and Evolution 35:1547-1549.

- 533 34. Isabel S, Graña-Miraglia L, Gutierrez JM, Bundalovic-Torma C, Groves HE,  
534 Isabel MR, Eshaghi A, Patel SN, Gubbay JB, Poutanen T, Guttman DS,  
535 Poutanen SM. Evolutionary and structural analyses of SARS-CoV-2 D614G  
536 spike protein mutation now documented worldwide. *Sci Rep.* 2020 Aug  
537 20;10(1):14031. doi: 10.1038/s41598-020-70827-z. PMID: 32820179; PMCID:  
538 PMC7441380.
- 539 35. Bal A, Destras G, Gaymard A, Stefic K, Marlet J, Eymieux S, Regue H,  
540 Semanas Q, d'Aubarede C, Billaud G, Laurent F, Gonzalez C, Mekki Y, Valette  
541 M, Bouscambert M, Gaudy-Graffin C, Lina B, Morfin F, Josset L; COVID-  
542 Diagnosis HCL Study Group. Two-step strategy for the identification of SARS-  
543 CoV-2 variant of concern 202012/01 and other variants with spike deletion H69-  
544 V70, France, August to December 2020. *Euro Surveill.* 2021  
545 Jan;26(3):2100008. doi: 10.2807/1560-7917.ES.2021.26.3.2100008. PMID:  
546 33478625; PMCID: PMC7848679.
- 547 36. Alpert T, Brito AF, Lasek-Nesselquist E, Rothman J, Valesano AL, MacKay MJ,  
548 Petrone ME, Breban MI, Watkins AE, Vogels CBF, Kalinich CC, Dellicour S,  
549 Russell A, Kelly JP, Shudt M, Plitnick J, Schneider E, Fitzsimmons WJ, Khullar  
550 G, Metti J, Dudley JT, Nash M, Beaubier N, Wang J, Liu C, Hui P, Muyombwe  
551 A, Downing R, Razeq J, Bart SM, Grills A, Morrison SM, Murphy S, Neal C,  
552 Laszlo E, Rennert H, Cushing M, Westblade L, Velu P, Craney A, Cong L,  
553 Peaper DR, Landry ML, Cook PW, Fauver JR, Mason CE, Luring AS, St  
554 George K, MacCannell DR, Grubaugh ND. Early introductions and transmission  
555 of SARS-CoV-2 variant B.1.1.7 in the United States. *Cell.* 2021 May  
556 13;184(10):2595-2604.e13. doi: 10.1016/j.cell.2021.03.061. Epub 2021 Apr 3.  
557 PMID: 33891875; PMCID: PMC8018830.
- 558 37. Loconsole D, Sallustio A, Accogli M, Leaci A, Sanguedolce A, Parisi A,  
559 Chironna M. Investigation of an outbreak of symptomatic SARS-CoV-2 VOC  
560 202012/01-lineage B.1.1.7 infection in healthcare workers, Italy. *Clin Microbiol*  
561 *Infect.* 2021 May 10:S1198-743X(21)00228-7. doi: 10.1016/j.cmi.2021.05.007.  
562 Epub ahead of print. PMID: 33984489; PMCID: PMC8107058.
- 563 38. Fourati S, Decousser JW, Khouider S, N'Debi M, Demontant V, Trawinski E,  
564 Gourgeon A, Gangloff C, Destras G, Bal A, Josset L, Soulier A, Costa Y,  
565 Gricourt G, Lina B, Lepeule R, Pawlotsky JM, Rodriguez C. Novel SARS-CoV-  
566 2 Variant Derived from Clade 19B, France. *Emerg Infect Dis.* 2021

567 May;27(5):1540-1543. doi: 10.3201/eid2705.210324. PMID: 33900195;  
568 PMCID: PMC8084519.  
569

570 **LEGENDS**

571 **Figure1.** Samples collection period investigated in the present study

572 The graph displays the number of cases and the number of deaths in Tunisia since  
573 the declaration of the pandemic in March 2020. The Abscisse axe represents the  
574 number of weeks from March 2020 till May 2021. Weeks highlighted in red color  
575 represents the samples collection period investigated in the present study.

576 **Figure2.** Phylogenetic tree of 201 SARS-CoV-2 sequences based on partial S gene  
577 nucleotide sequencing.

578 The phylogenetic tree includes 201 Tunisian sequences compared to 9 representative  
579 reference sequences of SARS-Cov-2 Clades. The tree was performed using the  
580 neighbor joining method and the Tamura 3-parameter (T92) model. Topology was  
581 supported by 1000 bootstrap replicates. The sequences reported in this study are  
582 shown in bold, and indicated by the laboratory code. The sequences downloaded from  
583 GISAID are indicated by their accession number followed. Cluster 1 in purple color  
584 denotes sequences presenting the D614G substitution and the lack of the amino acid  
585 substitution N501Y. Cluster 2 in blue color includes sequences having the N501Y,  
586 A570D, D614G and P681H substitutions. Cluster 3 in red color groups sequences with  
587 the N501Y, A653V and H655Y substitutions and the lack of the amino acid substitution  
588 D614G.

589 **Figure3.** Phylogenetic tree of 18 SARS-CoV-2 whole genome sequences circulating  
590 in Tunisia compared to 9 reference strain genomes.

591 The phylogenetic tree includes 18 Tunisian sequences compared to 9 representative  
592 reference sequences of SARS-Cov-2 Clades. The tree was performed using the  
593 neighbor joining method and the Tamura 3-parameter (T92) model. Topology was  
594 supported by 1000 bootstrap replicates. The sequences reported in this study are  
595 shown in bold, and indicated by the laboratory code. The sequences downloaded from  
596 GISAID database are indicated by their accession number. Cluster 1 in purple color,  
597 Clade 2 in blue color and Clade 3 in red.

Table.1 Amino acid substitution profile in the sequenced fragment of the S gene

| Mutation profile           | Cluster.1<br>N=174 | Cluster.2<br>N=15 | Cluster.3<br>N=12 |
|----------------------------|--------------------|-------------------|-------------------|
| E484K, D614G               | 02                 | 0                 | 0                 |
| E484K, D614G, Q677H        | 01                 | 0                 | 0                 |
| D614G, S637L, A647S        | 01                 | 0                 | 0                 |
| D614G, I666L               | 01                 | 0                 | 0                 |
| D614G, Q675L               | 01                 | 0                 | 0                 |
| D574Y, D614G, A626S        | 01                 | 0                 | 0                 |
| D614G, A626S               | 02                 | 0                 | 0                 |
| D614G, V622F               | 01                 | 0                 | 0                 |
| D614G, E619Q               | 01                 | 0                 | 0                 |
| D614G, D627E               | 16                 | 0                 | 0                 |
| D614G                      | 147                | 0                 | 0                 |
| N501Y, A570D, D614G, P681H | 0                  | 15                | 0                 |
| N501Y, A653V, Q655H        | 0                  | 0                 | 11                |
| N501Y, A653V, Q655H, Q677H | 0                  | 0                 | 01                |





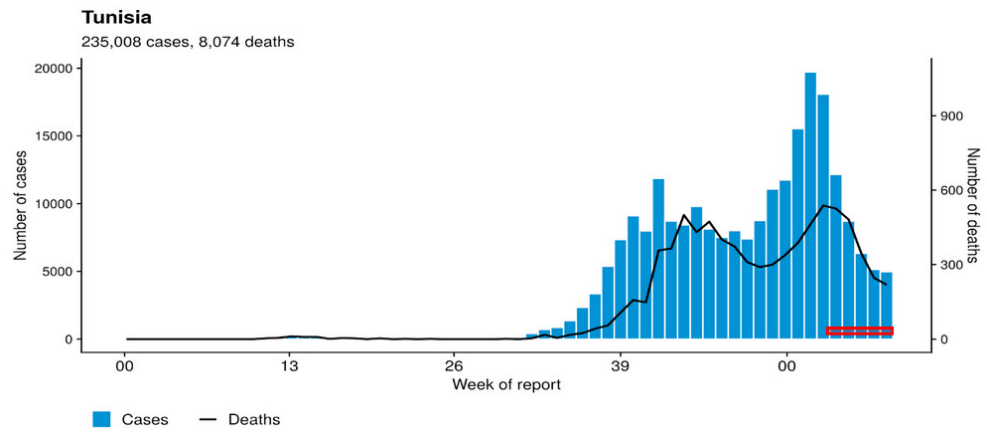

**Figure1:** Samples collection period investigated in the present study

Figure.2

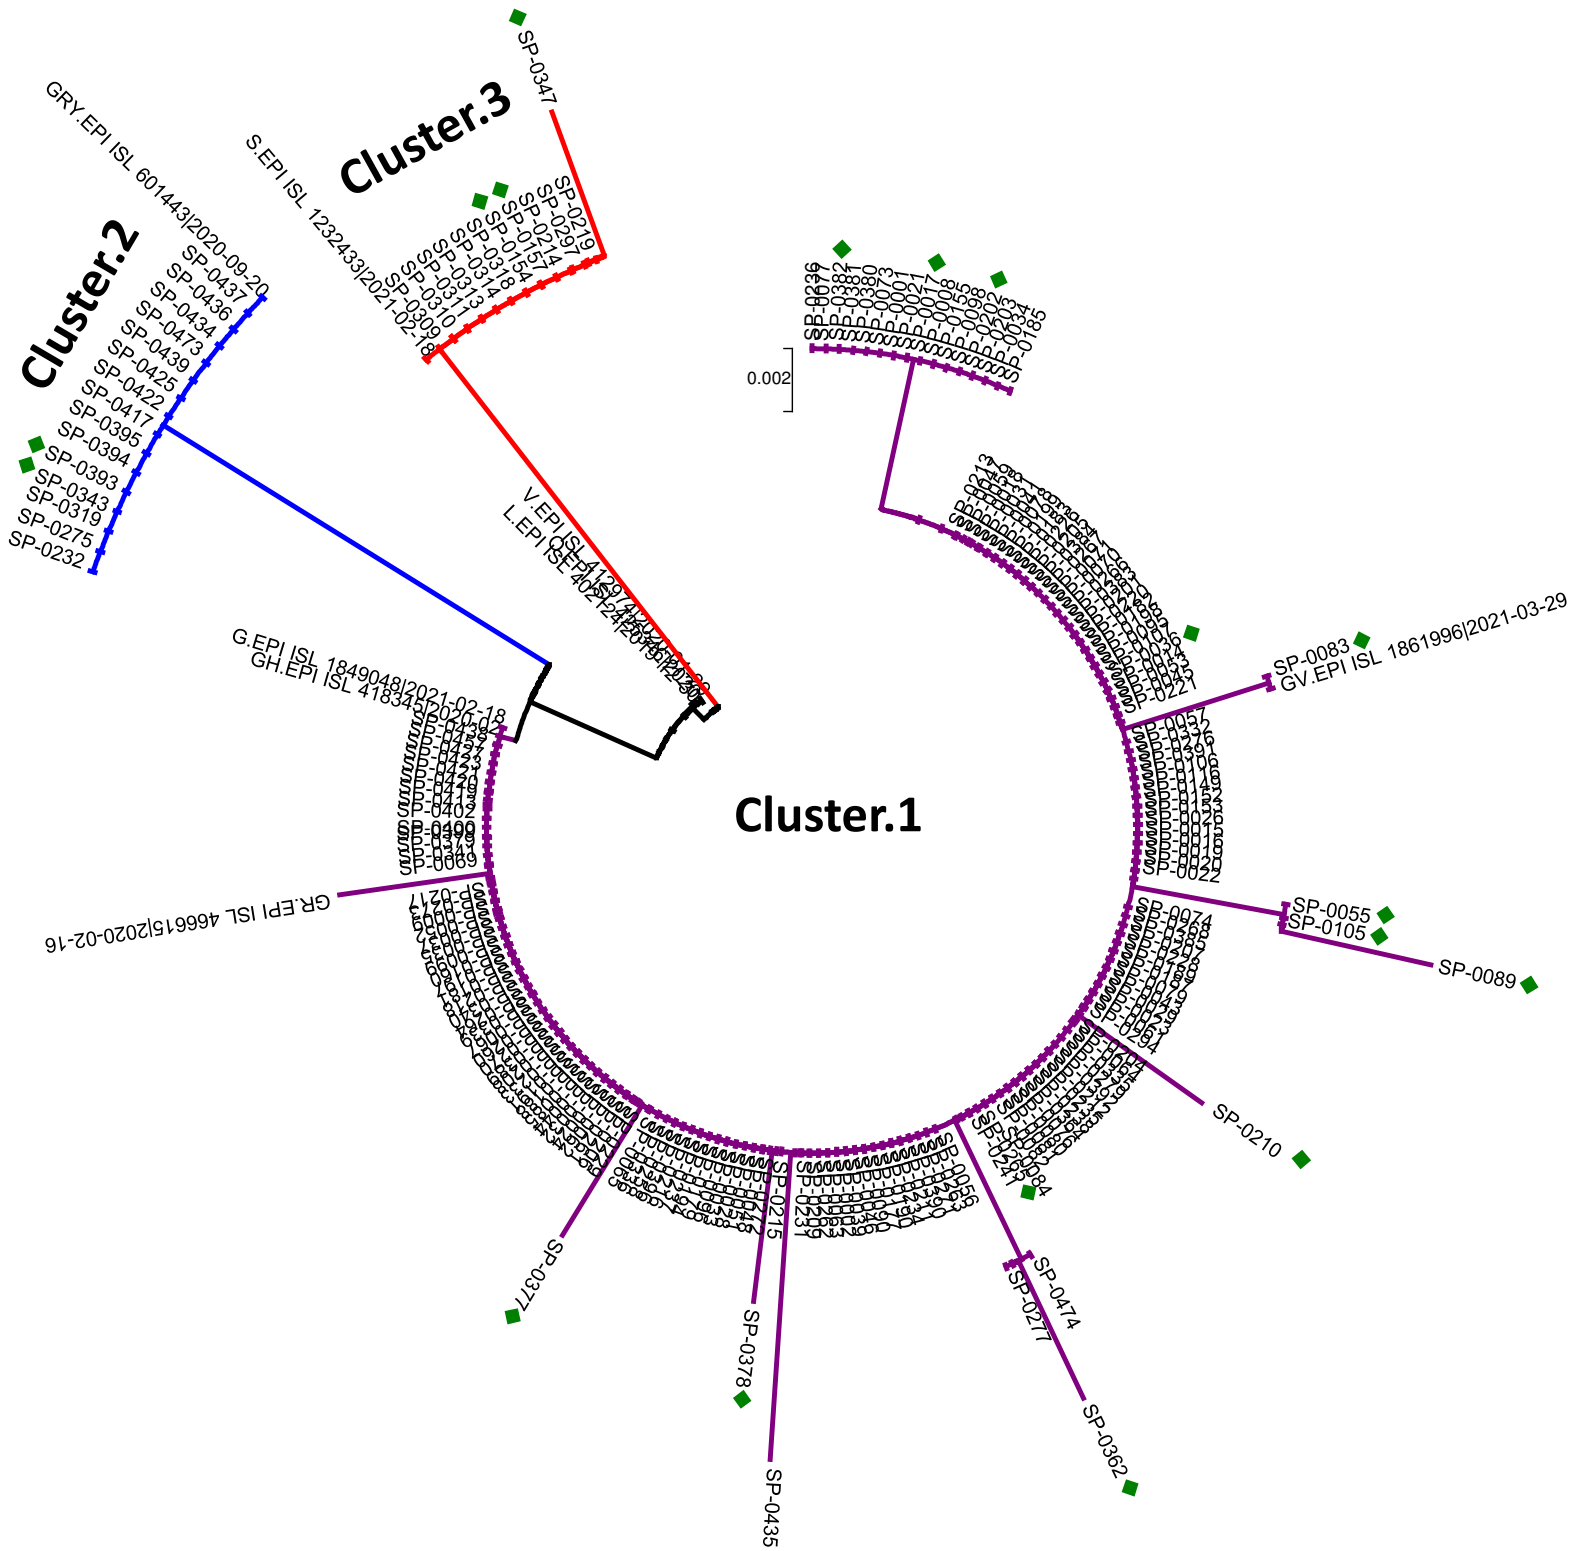

Figure.3

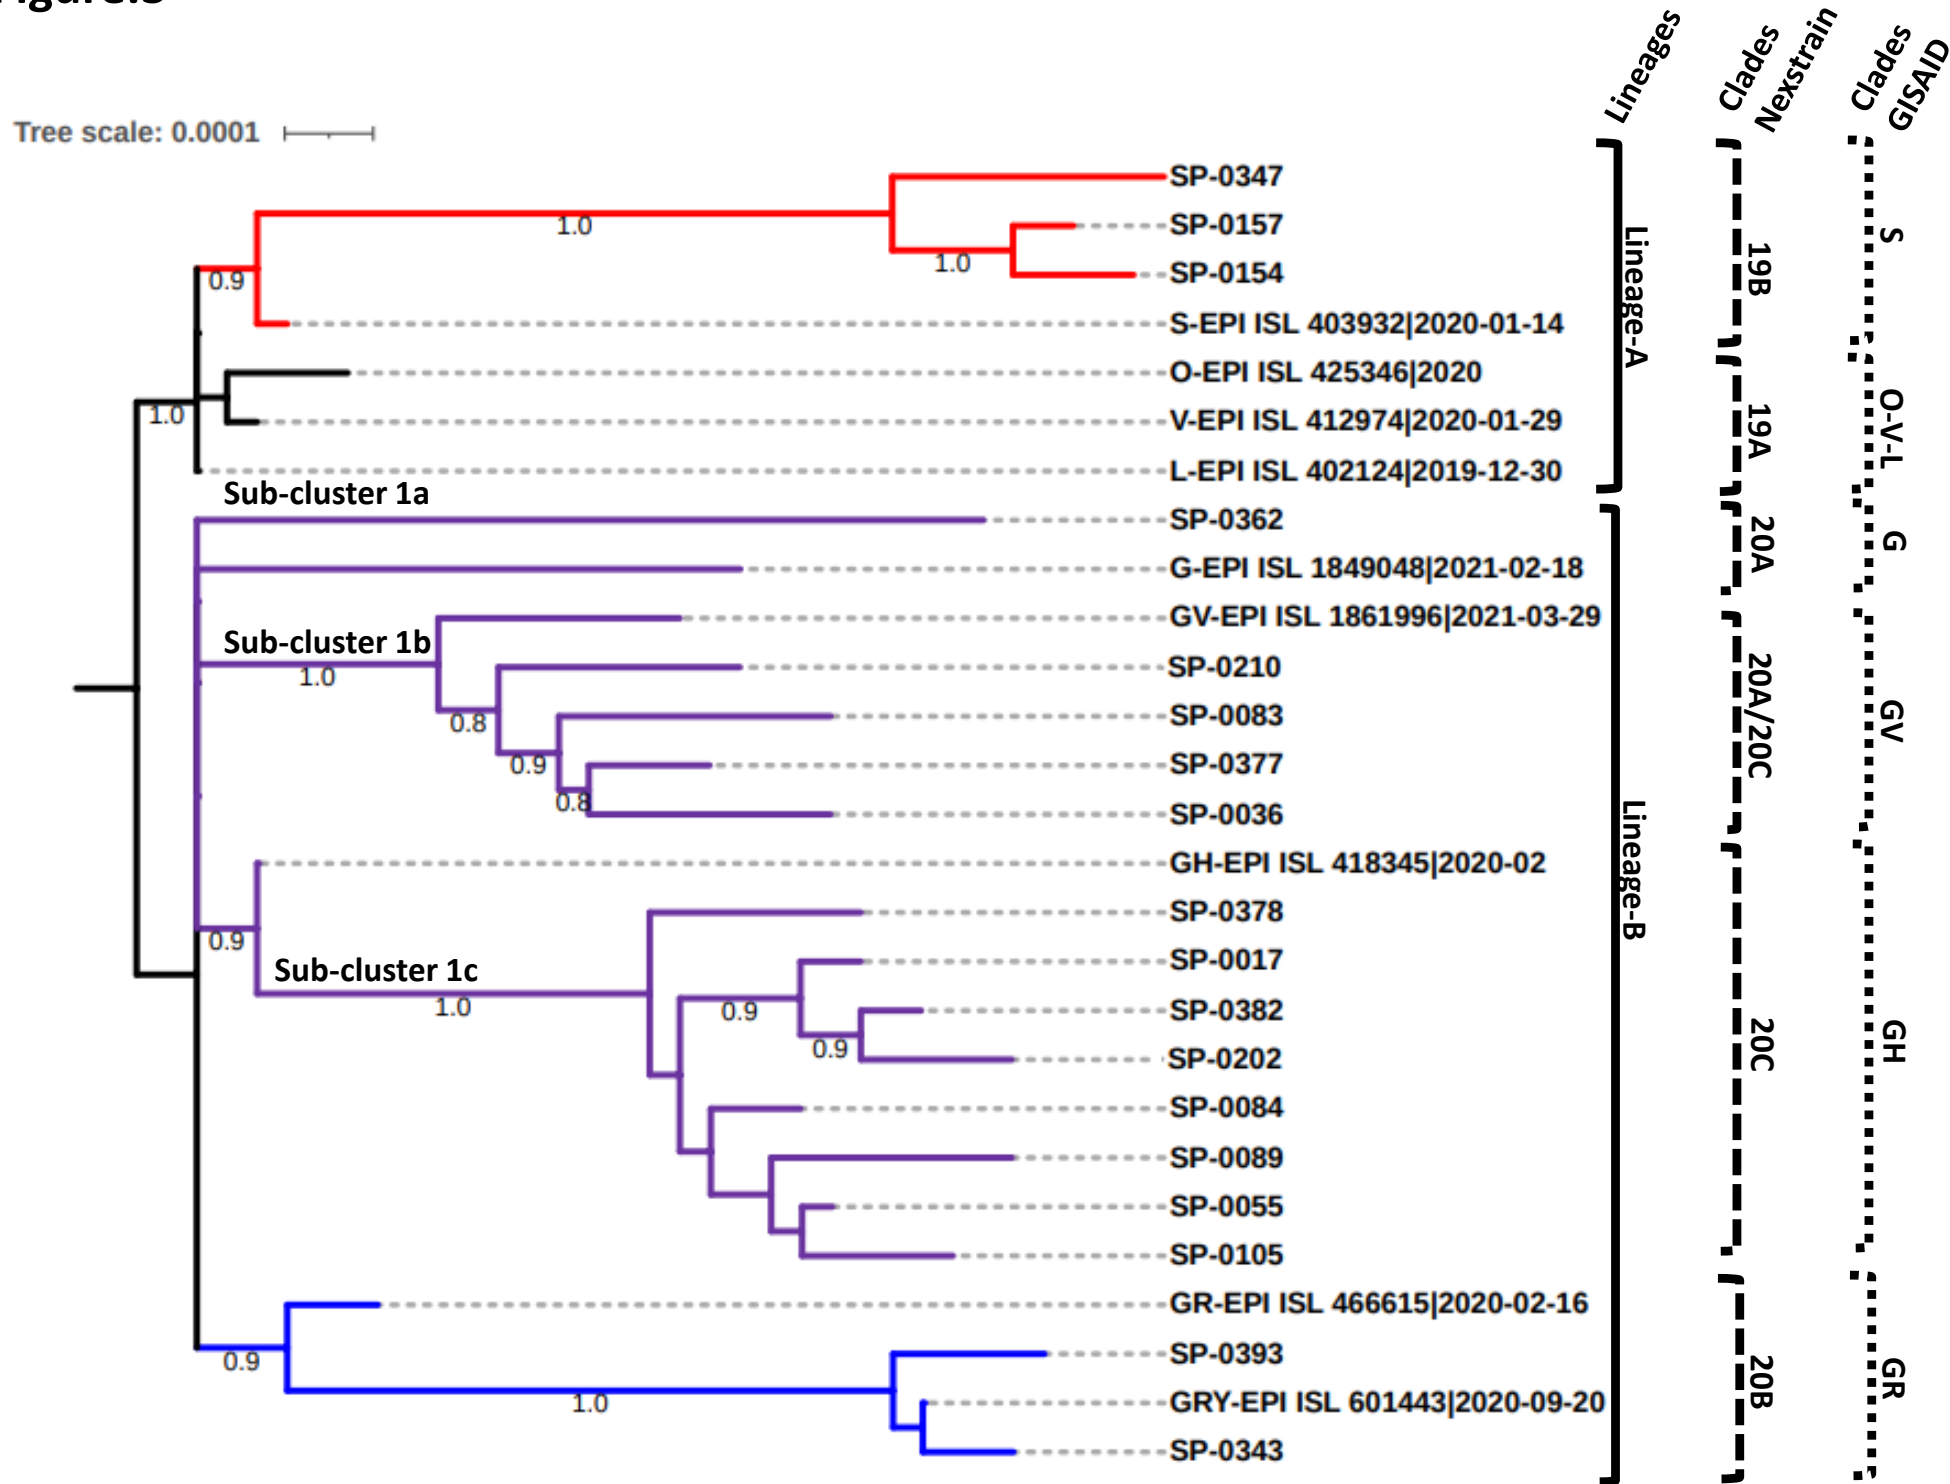

Source: https://www.biorxiv.org/content/10.1101/2021.06.18.449083v1.full.pdf
